# Supplementary material for: Genetic Tools for Coronary Risk Assessment in Type 2 Diabetes: A Cohort Study From the ACCORD Clinical Trial
Source: Oxford University Press journal article supplement (doi:10.2337/dc18-0709), 2018-09-27
Supplement: dc180709supplementarydata2.xlsx [file dc180709supplementarydata2.xlsx]

## Sheet: Sheet1
Supplementary Table 1. List of 204 independent CAD SNPs, representing 160 CAD loci, with year of discovery and their inclusion/exclusion in different genetic risk score (GRS). GRS by years: Each SNPs was included in a specific GRS-year if that SNP (or a SNP in LD with it, R2>0.2) was already known to be associated with CAD at GWAS levels in that specific year (or in a previous one).
Locus#	Locus Name	chr	position (hg19)	SNP	GRS-2010	GRS-2011	GRS-2013	GRS-2015	GRS-2017
1	MORN1	1	2252205	rs36096196	0	0	0	0	1
2	PRDM16	1	3325912	rs2493298	0	0	0	0	1
3	FHL3	1	38461319	rs61776719	0	0	0	0	1
4	PCSK9	1	55496039	rs11206510	1	1	1	1	1
4	PCSK9	1	55505647	rs11591147	0	0	0	0	1
5	PLPP3(PPAP2B)	1	56966350	rs17114046	0	1	1	1	1
5	PLPP3(PPAP2B)	1	56986303	rs147055617	0	0	0	0	1
5	PLPP3(PPAP2B)	1	57016950	rs112470402	0	0	0	0	1
6	PSRC1(SORT1)	1	109821511	rs602633	1	1	1	1	1
7	NGF	1	115753482	rs11806316	0	0	0	0	1
8	TDRKH	1	151762308	rs11810571	0	0	0	0	1
9	IL6R	1	154422067	rs4845625	0	0	1	1	1
10	ATP1B1	1	169094459	rs1892094	0	0	0	0	1
11	DDX59,CAMSAP2	1	200646073	rs6700559	0	0	0	0	1
12	LMOD1	1	201872264	rs2820315	0	0	0	0	1
13	HHAT	1	210468999	rs60154123	0	0	0	0	1
14	MIA3	1	222823529	rs17465637	1	1	1	1	1
15	AGT	1	230845794	rs699	0	0	0	0	1
16	OSR1(AK097927)	2	19942473	rs16986953	0	0	0	1	1
17	APOB	2	21291529	rs668948	0	0	1	1	1
18	ABCG8,ABCG5	2	44073881	rs6544713	0	0	1	1	1
18	ABCG8,ABCG5	2	44081627	rs4076834	0	0	0	0	1
19	PRKCE	2	45896437	rs582384	0	0	0	0	1
20	VAMP8,VAMP5	2	85809989	rs1561198	0	0	1	1	1
21	ZEB2,TEX41	2	145270592	rs6740731	0	0	0	0	1
21	ZEB2,TEX41	2	145286559	rs17678683	0	0	0	1	1
21	ZEB2,TEX41	2	145801461	rs2252641	0	0	1	1	1
22	FIGN	2	164957251	rs12999907	0	0	0	0	1
23	CALCRL	2	188196469	rs840616	0	0	0	0	1
24	WDR12,NBEAL1	2	203893999	rs115654617	1	1	1	1	1
25	FN1	2	216291359	rs17517928	0	0	0	0	1
25	FN1	2	216304384	rs1250229	0	0	0	0	1
26	TNS1	2	218669225	rs61741262	0	0	0	0	1
26	TNS1	2	218683154	rs2571445	0	0	0	0	1
27	LOC646736	2	227100698	rs2972146	0	0	0	0	1
28	KCNJ13,GIGYF2	2	233633460	rs1801251	0	0	0	0	1
29	COL6A3	2	238223955	rs11677932	0	0	0	0	1
30	FGD5	3	14901525	rs13079221	0	0	0	0	1
31	SNORD77,ALS2CL	3	46688562	rs7633770	0	0	0	0	1
32	CDC25A	3	48193515	rs7617773	0	0	0	0	1
33	RHOA	3	49448566	rs7623687	0	0	0	0	1
34	UMPS,ITGB5	3	124450081	rs4678145	0	0	0	0	1
35	DNAJC13	3	132257961	rs10512861	0	0	0	0	1
36	STAG1	3	136069472	rs667920	0	0	0	0	1
37	MRAS	3	138092889	rs185244	1	1	1	1	1
38	ARHGEF26	3	153839866	rs12493885	0	0	0	0	1
39	CCNL1	3	156852592	rs4266144	0	0	0	0	1
40	FNDC3B	3	172115902	rs12897	0	0	0	0	1
41	HGFAC,RGS12	4	3449652	rs16844401	0	0	0	0	1
42	REST,NOA1	4	57838583	rs17087335	0	0	0	1	1
43	SHROOM3	4	77416627	rs12500824	0	0	0	0	1
44	FGF5	4	81181072	rs10857147	0	0	0	0	1
45	HNRNPD	4	82587050	rs11099493	0	0	0	0	1
46	UNC5C	4	96117371	rs3775058	0	0	0	0	1
47	MAD2L1	4	120909501	rs7678555	0	0	0	0	1
48	ZNF827	4	146782837	rs35879803	0	0	0	0	1
49	EDNRA	4	148281001	rs4593108	0	0	1	1	1
49	EDNRA	4	148400819	rs6842241	0	0	0	0	1
50	GUCY1A3,MAP9	4	156436517	rs13118820	0	0	0	0	1
50	GUCY1A3,MAP9	4	156635309	rs7692387	0	0	1	1	1
51	PALLD	4	169687725	rs7696431	0	0	0	0	1
52	SEMA5A	5	9556694	rs1508798	0	0	0	0	1
53	LOC101928448	5	55860781	rs3936511	0	0	0	0	1
54	LOX	5	121413208	rs1800449	0	0	0	0	1
55	SLC22A4-SLC22A5	5	131667353	rs273909	0	0	1	1	1
56	ARHGAP26	5	142516897	rs246600	0	0	0	0	1
57	FOXC1	6	1617143	rs9501744	0	0	0	0	1
58	PHACTR1	6	12756658	rs1412748	0	0	0	0	1
58	PHACTR1	6	12903957	rs9349379	1	1	1	1	1
59	HDGFL1	6	22598259	rs7766436	0	0	0	0	1
60	C2	6	31919578	rs2072633	0	0	0	0	1
61	ANKS1A,C6orf16	6	34618893	rs2814993	0	0	0	0	1
61	ANKS1A,C6orf16	6	35034800	rs17609940	0	1	1	1	1
62	CDKN1A,PANDAR	6	36638636	rs1321309	0	0	0	0	1
63	KCNK5	6	39174922	rs10947789	0	0	1	1	1
64	VEGFA	6	43758873	rs6905288	0	0	0	0	1
65	PRIM2	6	57160572	rs9367716	0	0	0	0	1
66	RP11-379B8.1	6	82612271	rs4613862	0	0	0	0	1
67	CENPW	6	126717064	rs1591805	0	0	0	0	1
68	TCF21	6	134209837	rs2327429	0	1	1	1	1
68	TCF21	6	134214227	rs2327433	0	0	0	0	1
69	PLEKHG1	6	150997401	rs17080091	0	0	0	0	1
70	IGF2R	6	160465291	rs688359	1	1	1	1	1
70	LPA,PLG,LPAL2,SLC22A3	6	160679400	rs624249	0	0	0	0	1
70	LPA,PLG,LPAL2,SLC22A3	6	160863532	rs2048327	0	0	1	1	1
70	LPA,PLG,LPAL2,SLC22A3	6	160911596	rs147555597	0	0	0	0	1
70	LPA,PLG,LPAL2,SLC22A3	6	161005610	rs55730499	0	0	0	1	1
70	LPA,PLG,LPAL2,SLC22A3	6	161056112	rs9365196	0	0	0	0	1
70	LPA,PLG,LPAL2,SLC22A3	6	161102643	rs9457995	0	0	0	0	1
70	LPA,PLG,LPAL2,SLC22A3	6	161111700	rs186696265	1	1	1	1	1
70	LPA,PLG,LPAL2,SLC22A3	6	161143608	rs4252120	0	0	1	1	1
71	MAD1L1	7	1937261	rs10267593	0	0	0	0	1
72	DAGLB*	7	6446027	rs10951983	0	0	0	0	1
73	TMEM106B	7	12261911	rs11509880	0	0	0	0	1
74	HDAC9	7	19049388	rs2107595	0	0	1	1	1
75	CCM2	7	45077978	rs2107732	0	0	0	0	1
76	7q22(BCAP29)	7	107244545	rs10953541	0	1	1	1	1
77	CFTR,CCTNBP2	7	117332914	rs975722	0	0	0	0	1
78	ZC3HC1	7	129663496	rs11556924	0	1	1	1	1
79	PARP12	7	139757136	rs10237377	0	0	0	0	1
80	NOS3	7	150690176	rs3918226	0	0	0	1	1
81	NAT2	8	18286997	rs6997340	0	0	0	0	1
82	LPL	8	19800529	rs6997330	0	0	0	0	1
82	LPL	8	19824667	rs15285	0	0	1	1	1
83	BMP1	8	22033615	rs6984210	0	0	0	0	1
84	ZFPM2	8	106565414	rs10093110	0	0	0	0	1
85	TRIB1	8	126490972	rs2954029	0	0	1	1	1
86	CDKN2B,CDKN2A	9	21706571	rs896655	0	0	0	0	1
86	CDKN2B,CDKN2A	9	21970916	rs3731249	0	0	0	0	1
86	CDKN2B,CDKN2A	9	22062012	rs4977754	1	1	1	1	1
86	CDKN2B,CDKN2A	9	22073996	rs1855185	0	0	0	0	1
86	CDKN2B,CDKN2A	9	22098619	rs2891168	0	0	0	1	1
86	CDKN2B,CDKN2A	9	22113324	rs13301964	0	0	1	1	1
87	KLF4	9	110517794	rs944172	0	0	0	0	1
88	SVEP1	9	113169775	rs111245230	0	0	0	0	1
89	DAB2IP	9	124420173	rs885150	0	0	0	0	1
90	ABO	9	136149399	rs507666	0	1	1	1	1
91	CDC123	10	12303813	rs61848342	0	0	0	0	1
92	KIAA1462	10	30317073	rs9337951	0	1	1	1	1
93	CXCL12	10	44480811	rs1870634	0	0	1	1	1
93	CXCL12	10	44777560	rs1657346	1	1	1	1	1
94	TSPAN14	10	82251514	rs17680741	0	0	0	0	1
95	LIPA	10	91004886	rs2246942	0	1	1	1	1
96	AS3MT,CYP17A1,CNNM2	10	104638480	rs3740390	0	1	1	1	1
97	STN1	10	105693644	rs4918072	0	0	0	0	1
98	HTRA1	10	124237612	rs4752700	0	0	0	0	1
99	TRIM5,TRIM22	11	5701074	rs11601507	0	0	0	0	1
100	SWAP70	11	9751196	rs10840293	0	0	0	1	1
100	MRVI1,CTR9	11	10745394	rs11042937	0	0	0	0	1
101	ARNTL	11	13301548	rs1351525	0	0	0	0	1
102	HSD17B12	11	43696917	rs7116641	0	0	0	0	1
103	PCNX3	11	65391317	rs12801636	0	0	0	0	1
104	SERPINH1	11	75274150	rs590121	0	0	0	0	1
104	SERPINH1	11	75284334	rs659418	0	0	0	0	1
105	ARHGAP42	11	100624599	rs7947761	0	0	0	0	1
106	PDGFD,DYNC2H1	11	103660567	rs974819	0	1	1	1	1
107	APOA1-A5-A4-C3,ZNF259	11	116648917	rs964184	0	1	1	1	1
108	C1S	12	7175872	rs11838267	0	0	0	0	1
109	LOC156393	12	20220033	rs10841443	0	0	0	0	1
110	HOXC4	12	54513915	rs11170820	0	0	0	0	1
111	LRP1	12	57527283	rs11172113	0	0	0	0	1
112	ATP2B1	12	90013089	rs2681492	0	0	0	1	1
113	NDUFA12	12	95355541	rs7306455	0	0	0	0	1
114	SH2B3,ATXN2,HNF1A	12	111884608	rs3184504	1	1	1	1	1
115	KSR2	12	118265441	rs11830157	0	0	0	1	1
116	HNF1A	12	121416988	rs2244608	1	1	1	1	1
117	SCARB1,CCDC92	12	124427306	rs11057401	0	0	0	0	1
117	SCARB1,CCDC92	12	125307053	rs11057830	0	0	0	0	1
118	FLT1	13	28973621	rs9319428	0	0	1	1	1
119	N4BP2L2	13	33058333	rs9591012	0	0	0	0	1
120	COL4A1/A2	13	110818102	rs11617955	0	0	0	1	1
120	COL4A1/A2	13	110960943	rs3809346	0	1	1	1	1
120	COL4A1/A2	13	111040681	rs11838776	0	0	0	1	1
120	COL4A1/A2	13	111049623	rs9515203	0	0	1	1	1
121	MCF2L	13	113631780	rs1317507	0	0	0	0	1
122	ARID4A	14	58794001	rs2145598	0	0	0	0	1
123	TMED10	14	75614504	rs3832966	0	0	0	0	1
124	SERPINA1,SERPINA2	14	94838142	rs112635299	0	0	0	0	1
125	HHIPL1,CYP46A1	14	100133942	rs2895811	0	1	1	1	1
125	HHIPL1,CYP46A1	14	100148961	rs8003602	0	0	1	1	1
126	OAZ2,RBPMS2	15	65024204	rs6494488	0	0	0	0	1
127	SMAD3	15	67450305	rs17228058	0	0	0	1	1
128	ADAMTS7	15	79017861	rs8039034	0	0	0	0	1
128	ADAMTS7	15	79139000	rs11637783	0	1	1	1	1
129	MFGE8-ABHD2	15	89574218	rs8042271	0	0	0	1	1
130	FURIN	15	91416550	rs17514846	0	0	1	1	1
131	LINC00924 (15q26.2)	15	96146414	rs17581137	0	0	0	0	1
132	CETP	16	56995236	rs1800775	0	0	0	0	1
133	DHX38,TXNL4B	16	72130815	rs1050362	0	0	0	0	1
134	CFDP1	16	75462055	rs12930452	0	0	0	0	1
135	PLCG2	16	81906423	rs7199941	0	0	0	0	1
136	CDH13	16	83045790	rs7500448	0	0	0	0	1
137	SMG6,SRR	17	2126504	rs216172	0	1	1	1	1
137	SMG6,SRR	17	2170216	rs170041	0	0	0	0	1
138	RASD1, SMCR3, PEMT	17	17543722	rs12936587	0	1	1	1	1
139	CORO6,ANKRD13B	17	27941886	rs13723	0	0	0	0	1
140	(17q11.2)	17	30033514	rs76954792	0	0	0	0	1
141	DHX58,KAT2A	17	40257163	rs2074158	0	0	0	0	1
142	GOSR2	17	45013271	rs17608766	0	0	0	0	1
143	UBE2Z,GIP	17	47047868	rs3895874	0	1	1	1	1
143	UBE2Z,ZNF652	17	47440466	rs16948048	0	0	0	0	1
144	BCAS3	17	59013488	rs7212798	0	0	0	1	1
145	PECAM1	17	62387091	rs1867624	0	0	0	0	1
146	ACAA2	18	47229717	rs9964304	0	0	0	0	1
147	PMAIP1,MC4R	18	57838401	rs663129	0	0	0	1	1
148	ANGPTL4	19	8429323	rs116843064	0	0	0	0	1
149	LDLR	19	11202306	rs6511720	0	0	1	1	1
149	LDLR	19	11277232	rs4804573	0	0	0	0	1
150	MAP1S,FCHO1	19	17855763	rs73015714	0	0	0	0	1
151	ZNF507,LOC400684	19	32882020	rs12976411	0	0	0	1	1
152	TGFB1,CCDC97	19	41790086	rs138120077	0	0	0	0	1
152	TGFB1,CCDC97	19	41832231	rs12980942	0	0	0	0	1
152	TGFB1,CCDC97	19	41851509	rs4803455	0	0	0	0	1
153	APOE,APOC1,TOMM4	19	45412079	rs7412	0	0	1	1	1
153	APOE,APOC1,TOMM4	19	45422946	rs4420638	0	0	1	1	1
153	SNRPD2	19	46190268	rs1964272	0	0	0	0	1
154	NCOA6	20	33313566	rs6088590	0	0	0	0	1
154	PROCR	20	33764554	rs867186	0	0	0	0	1
155	ZHX3	20	39924279	rs6102343	0	0	0	0	1
156	PCIF1,ZNF335	20	44586023	rs3827066	0	0	0	0	1
157	ZNF831	20	57714025	rs260020	0	0	0	0	1
158	MAP3K7CL	21	30533076	rs2832227	0	0	0	0	1
159	MRPS6	21	35593827	rs28451064	1	1	1	1	1
160	POM121L9P,ADORA2A	22	24658858	rs180803	0	0	0	1	1
* Since the top sentinel SNP (rs7797644, identifed by Van Der Harst P et al, Circ. Res. 2017) in this locus (DAGLB) was not available in the ACCORD-GWAS dataset, the second most significant SNP at the same locus (rs10951983, available in ACCORD-GWAS dataset) was used.
