# Supplementary material for: Genetic Tools for Coronary Risk Assessment in Type 2 Diabetes: A Cohort Study From the ACCORD Clinical Trial
Source: Oxford University Press journal article supplement (doi:10.2337/dc18-0709), 2018-09-27
Supplement: dc180709supplementarydata3.xlsx [file dc180709supplementarydata3.xlsx]

## Sheet: Sheet1
Supplementary Table2. List of 204 CAD SNPs and their associations with history of CAD (adjusted for sex and age); Note: Risk allele referred to the allele associated with higher CAD risk from literature.
Locus#	Locus	chr	position (hg19)	SNP	Risk Allele	Ref.nce Allele	ACCORD				Literature
							Risk Allele Frequency	Odds Ratio (95% CI)	P	FDR (q_value)	Known OR from literature	Known P from literature	Source
1	MORN1	1	2252205	rs36096196	T	C	0.152	1.00 (0.89-1.13)	0.9536	0.96	1.05	1.33e-08	Van Der Harst P, Circ Res. ePub Dec 2017
2	PRDM16	1	3325912	rs2493298	A	C	0.143	0.99 (0.88-1.12)	0.9346	0.954	1.06	1.99e-09	Van Der Harst P, Circ Res. ePub Dec 2017
3	FHL3	1	38461319	rs61776719	A	C	0.541	0.97 (0.89-1.05)	0.4585	0.719	1.04	1.16e-09	Van Der Harst P, Circ Res. ePub Dec 2017
4	PCSK9	1	55496039	rs11206510	T	C	0.818	1.02 (0.91-1.14)	0.7233	0.868	1.08	2.34e-08	Nikpay M: Nat Genet. 2015 Oct;47(10):1121-1130
4	PCSK9	1	55505647	rs11591147	G	T	0.985	1.36 (0.94-1.96)	0.1006	0.394	1.33	1.61e-25	Van Der Harst P, Circ Res. ePub Dec 2017
5	PLPP3(PPAP2B)	1	56966350	rs17114046	A	G	0.907	1.14 (0.98-1.32)	0.0911	0.394	1.11	1.43e-27	Van Der Harst P, Circ Res. ePub Dec 2017
5	PLPP3(PPAP2B)	1	56986303	rs147055617	G	A	0.095	1.02 (0.88-1.18)	0.7972	0.915	1.09	7.77e-14	Van Der Harst P, Circ Res. ePub Dec 2017
5	PLPP3(PPAP2B)	1	57016950	rs112470402	I	D	0.819	1.09 (0.96-1.23)	0.1736	0.478	1.05	4.99e-08	Nelson CP, Nat Genet. 2017 Sep;49(9):1385-1391
6	PSRC1(SORT1)	1	109821511	rs602633	G	T	0.783	1.18 (1.06-1.31)	0.0017	0.118	1.12	2.01e-59	Van Der Harst P, Circ Res. ePub Dec 2017
7	NGF	1	115753482	rs11806316	G	A	0.615	0.99 (0.91-1.08)	0.8027	0.915	1.04	4.99e-10	Van Der Harst P, Circ Res. ePub Dec 2017
8	TDRKH	1	151762308	rs11810571	G	C	0.851	1.08 (0.96-1.22)	0.2032	0.521	1.06	1.83e-11	Van Der Harst P, Circ Res. ePub Dec 2017
9	IL6R	1	154422067	rs4845625	T	C	0.428	1.07 (0.99-1.17)	0.0972	0.394	1.05	5.68e-16	Van Der Harst P, Circ Res. ePub Dec 2017
10	ATP1B1	1	169094459	rs1892094	C	T	0.483	1.07 (0.98-1.16)	0.1323	0.422	1.04	4.45e-13	Van Der Harst P, Circ Res. ePub Dec 2017
11	DDX59,CAMSAP2	1	200646073	rs6700559	C	T	0.526	1.08 (1.00-1.18)	0.0651	0.347	1.04	1.13e-08	Howson JMM; Nat Genet. 2017 Jul;49(7):1113-1120
12	LMOD1	1	201872264	rs2820315	T	C	0.308	1.02 (0.93-1.12)	0.6917	0.857	1.05	7.7e-10	Howson JMM; Nat Genet. 2017 Jul;49(7):1113-1125
13	HHAT	1	210468999	rs60154123	T	C	0.143	1.08 (0.96-1.22)	0.2042	0.521	1.04	2.58e-08	Van Der Harst P, Circ Res. ePub Dec 2017
14	MIA3	1	222823529	rs17465637	C	A	0.715	1.07 (0.97-1.17)	0.168	0.47	1.09	8.45e-31	Van Der Harst P, Circ Res. ePub Dec 2017
15	AGT	1	230845794	rs699	G	A	0.417	1.07 (0.99-1.17)	0.1044	0.394	1.04	2.12e-08	Van Der Harst P, Circ Res. ePub Dec 2017
16	OSR1(AK097927)	2	19942473	rs16986953	A	G	0.07	1.28 (1.09-1.50)	0.0025	0.118	1.09	1.35e-15	Van Der Harst P, Circ Res. ePub Dec 2017
17	APOB	2	21291529	rs668948	A	G	0.807	1.01 (0.91-1.12)	0.8834	0.929	1.07	1.92e-17	Van Der Harst P, Circ Res. ePub Dec 2017
18	ABCG8,ABCG5	2	44073881	rs6544713	T	C	0.316	1.12 (1.02-1.22)	0.0129	0.188	1.06	6.45e-19	Van Der Harst P, Circ Res. ePub Dec 2017
18	ABCG8,ABCG5	2	44081627	rs4076834	T	G	0.931	1.09 (0.92-1.29)	0.2997	0.632	1.12	1.22e-10	Verweij N; Sci Rep. 2017 Jun 5;7(1):2761
19	PRKCE	2	45896437	rs582384	A	C	0.561	0.96 (0.88-1.05)	0.3519	0.671	1.03	7.64e-09	Van Der Harst P, Circ Res. ePub Dec 2017
20	VAMP8,VAMP5	2	85809989	rs1561198	T	C	0.455	1.10 (1.01-1.20)	0.022	0.249	1.06	2.42e-23	Van Der Harst P, Circ Res. ePub Dec 2017
21	ZEB2,TEX41	2	145270592	rs6740731	A	G	0.162	0.89 (0.79-1.00)	0.0548	0.331	1.05	3.86e-09	Van Der Harst P, Circ Res. ePub Dec 2017
21	ZEB2,TEX41	2	145286559	rs17678683	G	T	0.096	1.04 (0.90-1.21)	0.5526	0.767	1.1	3e-09	Nikpay M: Nat Genet. 2015 Oct;47(10):1121-1130
21	ZEB2,TEX41	2	145801461	rs2252641	C	T	0.446	0.99 (0.91-1.08)	0.877	0.927	1.04	7.34e-13	Van Der Harst P, Circ Res. ePub Dec 2017
22	FIGN	2	164957251	rs12999907	A	G	0.825	0.99 (0.89-1.11)	0.9145	0.947	1.06	2.42e-11	Van Der Harst P, Circ Res. ePub Dec 2017
23	CALCRL	2	188196469	rs840616	C	T	0.645	0.96 (0.88-1.05)	0.3805	0.699	1.04	3e-09	Van Der Harst P, Circ Res. ePub Dec 2017
24	WDR12,NBEAL1	2	203893999	rs115654617	A	C	0.124	1.03 (0.91-1.17)	0.6297	0.818	1.13	2.06e-32	Van Der Harst P, Circ Res. ePub Dec 2017
25	FN1	2	216291359	rs17517928	C	T	0.745	0.99 (0.90-1.09)	0.8384	0.925	1.06	1.06e-08	Klarin D, Nat Genet. 2017 Sep;49(9):1392-1400
25	FN1	2	216304384	rs1250229	T	C	0.263	1.02 (0.93-1.12)	0.6595	0.841	1.07	2.54e-19	Van Der Harst P, Circ Res. ePub Dec 2017
26	TNS1	2	218669225	rs61741262	T	C	0.886	1.04 (0.91-1.19)	0.5449	0.767	1.06	2.33e-08	Van Der Harst P, Circ Res. ePub Dec 2017
26	TNS1	2	218683154	rs2571445	A	G	0.383	1.10 (1.01-1.20)	0.0335	0.282	1.05	4.55e-10	Howson JMM; Nat Genet. 2017 Jul;49(7):1113-1119
27	LOC646736	2	227100698	rs2972146	T	G	0.67	1.04 (0.95-1.14)	0.4052	0.706	1.06	1.46e-09	Klarin D, Nat Genet. 2017 Sep;49(9):1392-1399
28	KCNJ13,GIGYF2	2	233633460	rs1801251	A	G	0.35	1.05 (0.97-1.15)	0.2443	0.593	1.05	1.48e-09	Webb TR; J Am Coll Cardiol. 2017 Feb 21;69(7):823-837
29	COL6A3	2	238223955	rs11677932	G	A	0.677	1.01 (0.92-1.11)	0.8104	0.918	1.03	2.64e-08	Van Der Harst P, Circ Res. ePub Dec 2017
30	FGD5	3	14901525	rs13079221	C	G	0.427	0.99 (0.91-1.08)	0.7869	0.915	1.04	1.62e-10	Van Der Harst P, Circ Res. ePub Dec 2017
31	SNORD77,ALS2CL	3	46688562	rs7633770	A	G	0.42	1.03 (0.94-1.12)	0.5326	0.767	1.03	1.1e-08	Van Der Harst P, Circ Res. ePub Dec 2017
32	CDC25A	3	48193515	rs7617773	T	C	0.669	1.00 (0.91-1.09)	0.9261	0.954	1.04	2.39e-11	Van Der Harst P, Circ Res. ePub Dec 2017
33	RHOA	3	49448566	rs7623687	A	C	0.858	1.10 (0.98-1.24)	0.1105	0.394	1.08	3.54e-10	Nelson CP, Nat Genet. 2017 Sep;49(9):1385-1391
34	UMPS,ITGB5	3	124450081	rs4678145	C	G	0.121	1.04 (0.92-1.18)	0.5423	0.767	1.07	1.5e-13	Van Der Harst P, Circ Res. ePub Dec 2017
35	DNAJC13	3	132257961	rs10512861	G	T	0.87	1.03 (0.91-1.17)	0.6161	0.817	1.05	1.5e-08	Van Der Harst P, Circ Res. ePub Dec 2017
36	STAG1	3	136069472	rs667920	T	G	0.77	1.08 (0.97-1.19)	0.1486	0.446	1.05	6.08e-15	Van Der Harst P, Circ Res. ePub Dec 2017
37	MRAS	3	138092889	rs185244	T	C	0.169	1.06 (0.95-1.18)	0.3295	0.659	1.08	3.3e-18	Van Der Harst P, Circ Res. ePub Dec 2017
38	ARHGEF26	3	153839866	rs12493885	C	G	0.871	1.00 (0.88-1.14)	0.9662	0.966	1.08	1.13e-14	Van Der Harst P, Circ Res. ePub Dec 2017
39	CCNL1	3	156852592	rs4266144	G	C	0.32	0.95 (0.87-1.04)	0.2832	0.632	1.04	1.4e-08	Van Der Harst P, Circ Res. ePub Dec 2017
40	FNDC3B	3	172115902	rs12897	G	A	0.368	1.11 (1.02-1.21)	0.0201	0.244	1.04	1.94e-10	Van Der Harst P, Circ Res. ePub Dec 2017
41	HGFAC,RGS12	4	3449652	rs16844401	A	G	0.066	1.03 (0.87-1.22)	0.7103	0.857	1.07	4.04e-08	Van Der Harst P, Circ Res. ePub Dec 2017
42	REST,NOA1	4	57838583	rs17087335	T	G	0.194	1.04 (0.94-1.16)	0.4138	0.707	1.06	1.03e-08	Verweij N; Sci Rep. 2017 Jun 5;7(1):2761
43	SHROOM3	4	77416627	rs12500824	A	G	0.354	1.03 (0.94-1.12)	0.5823	0.783	1.04	4.13e-10	Van Der Harst P, Circ Res. ePub Dec 2017
44	FGF5	4	81181072	rs10857147	T	A	0.287	0.96 (0.88-1.06)	0.4296	0.707	1.06	1.11e-14	Van Der Harst P, Circ Res. ePub Dec 2017
45	HNRNPD	4	82587050	rs11099493	A	G	0.675	1.04 (0.95-1.14)	0.391	0.706	1.04	5.12e-10	Van Der Harst P, Circ Res. ePub Dec 2017
46	UNC5C	4	96117371	rs3775058	A	T	0.217	0.99 (0.89-1.10)	0.8604	0.925	1.04	7.63e-09	Van Der Harst P, Circ Res. ePub Dec 2017
47	MAD2L1	4	120909501	rs7678555	C	A	0.296	1.06 (0.97-1.16)	0.2196	0.553	1.06	3.13e-15	Van Der Harst P, Circ Res. ePub Dec 2017
48	ZNF827	4	146782837	rs35879803	C	A	0.654	1.01 (0.92-1.10)	0.9008	0.939	1.05	3.83e-08	Verweij N; Sci Rep. 2017 Jun 5;7(1):2761
49	EDNRA	4	148281001	rs4593108	C	G	0.833	0.98 (0.87-1.10)	0.7092	0.857	1.07	8.13e-15	Van Der Harst P, Circ Res. ePub Dec 2017
49	EDNRA	4	148400819	rs6842241	A	C	0.144	1.10 (0.98-1.24)	0.1152	0.394	1.08	1.31e-23	Van Der Harst P, Circ Res. ePub Dec 2017
50	GUCY1A3,MAP9	4	156436517	rs13118820	A	C	0.343	1.13 (1.03-1.23)	0.0079	0.146	1.04	1.4e-10	Van Der Harst P, Circ Res. ePub Dec 2017
50	GUCY1A3,MAP9	4	156635309	rs7692387	G	A	0.808	1.03 (0.93-1.15)	0.5772	0.783	1.07	4.14e-22	Van Der Harst P, Circ Res. ePub Dec 2017
51	PALLD	4	169687725	rs7696431	T	G	0.508	1.01 (0.93-1.10)	0.7884	0.915	1.04	2.73e-08	Van Der Harst P, Circ Res. ePub Dec 2017
52	SEMA5A	5	9556694	rs1508798	T	C	0.811	1.06 (0.95-1.18)	0.3012	0.632	1.05	4.83e-13	Van Der Harst P, Circ Res. ePub Dec 2017
53	LOC101928448	5	55860781	rs3936511	G	A	0.189	1.16 (1.05-1.30)	0.0052	0.119	1.04	3.74e-08	Van Der Harst P, Circ Res. ePub Dec 2017
54	LOX	5	121413208	rs1800449	T	C	0.17	1.10 (0.99-1.23)	0.0775	0.386	1.07	2.99e-09	Klarin D, Nat Genet. 2017 Sep;49(9):1392-1398
55	SLC22A4-SLC22A5	5	131667353	rs273909	G	A	0.112	1.11 (0.98-1.27)	0.1093	0.394	1.09	1e-08	CardiogramplusC4D, Nat Genet. 2013 Jan;45(1):25-33
56	ARHGAP26	5	142516897	rs246600	T	C	0.484	1.02 (0.93-1.11)	0.7036	0.857	1.05	2.08e-17	Van Der Harst P, Circ Res. ePub Dec 2017
57	FOXC1	6	1617143	rs9501744	C	T	0.853	0.91 (0.81-1.02)	0.1119	0.394	1.06	2.25e-08	Van Der Harst P, Circ Res. ePub Dec 2017
58	PHACTR1	6	12756658	rs1412748	T	A	0.507	1.09 (1.00-1.19)	0.048	0.31	1.05	1.25e-08	Verweij N; Sci Rep. 2017 Jun 5;7(1):2761
58	PHACTR1	6	12903957	rs9349379	G	A	0.397	1.17 (1.08-1.28)	0.0003	0.059	1.13	2.98e-77	Van Der Harst P, Circ Res. ePub Dec 2017
59	HDGFL1	6	22598259	rs7766436	T	C	0.303	1.05 (0.95-1.15)	0.3352	0.659	1.05	2.47e-12	Van Der Harst P, Circ Res. ePub Dec 2017
60	C2	6	31919578	rs2072633	G	A	0.575	1.06 (0.98-1.16)	0.153	0.446	1.04	6.28e-13	Van Der Harst P, Circ Res. ePub Dec 2017
61	ANKS1A,C6orf16	6	34618893	rs2814993	A	G	0.15	1.11 (0.99-1.25)	0.0704	0.359	1.06	9.7e-12	Van Der Harst P, Circ Res. ePub Dec 2017
61	ANKS1A,C6orf16	6	35034800	rs17609940	G	C	0.813	1.10 (0.98-1.22)	0.0998	0.394	1.07	1.36e-08	Cardiogram, Nat Genet. 2011 Mar 6;43(4):333-9
62	CDKN1A,PANDAR	6	36638636	rs1321309	A	G	0.492	0.97 (0.89-1.06)	0.4777	0.733	1.03	3.48e-08	Van Der Harst P, Circ Res. ePub Dec 2017
63	KCNK5	6	39174922	rs10947789	T	C	0.765	1.11 (1.01-1.22)	0.0387	0.282	1.05	1e-08	CardiogramplusC4D, Nat Genet. 2013 Jan;45(1):25-34
64	VEGFA	6	43758873	rs6905288	A	G	0.573	1.04 (0.95-1.13)	0.4137	0.707	1.05	1.93e-12	Van Der Harst P, Circ Res. ePub Dec 2017
65	PRIM2	6	57160572	rs9367716	G	T	0.697	1.05 (0.95-1.15)	0.3394	0.659	1.04	9.63e-10	Van Der Harst P, Circ Res. ePub Dec 2017
66	RP11-379B8.1	6	82612271	rs4613862	A	C	0.514	1.04 (0.95-1.13)	0.4022	0.706	1.03	6.58e-10	Van Der Harst P, Circ Res. ePub Dec 2017
67	CENPW	6	126717064	rs1591805	A	G	0.483	0.99 (0.91-1.08)	0.8297	0.925	1.04	2.11e-10	Van Der Harst P, Circ Res. ePub Dec 2017
68	TCF21	6	134209837	rs2327429	T	C	0.712	1.11 (1.01-1.21)	0.0385	0.282	1.07	3.21e-31	Van Der Harst P, Circ Res. ePub Dec 2017
68	TCF21	6	134214227	rs2327433	G	A	0.092	1.17 (1.01-1.35)	0.0361	0.282	1.08	1.03e-08	Verweij N; Sci Rep. 2017 Jun 5;7(1):2761
69	PLEKHG1	6	150997401	rs17080091	C	T	0.93	1.13 (0.96-1.33)	0.151	0.446	1.06	6.09e-09	Van Der Harst P, Circ Res. ePub Dec 2017
70	IGF2R	6	160465291	rs688359	G	A	0.372	1.02 (0.94-1.12)	0.6256	0.818	1.05	5.36e-15	Van Der Harst P, Circ Res. ePub Dec 2017
70	LPA,PLG,LPAL2,SLC22A3	6	160679400	rs624249	C	A	0.591	0.99 (0.91-1.08)	0.8614	0.925	1.06	9.11e-11	Verweij N; Sci Rep. 2017 Jun 5;7(1):2761
70	LPA,PLG,LPAL2,SLC22A3	6	160863532	rs2048327	C	T	0.365	1.04 (0.95-1.13)	0.4033	0.706	1.06	7e-11	CardiogramplusC4D, Nat Genet. 2013 Jan;45(1):25-35
70	LPA,PLG,LPAL2,SLC22A3	6	160911596	rs147555597	A	G	0.008	1.64 (1.03-2.60)	0.0365	0.282	1.49	2.73e-31	Van Der Harst P, Circ Res. ePub Dec 2017
70	LPA,PLG,LPAL2,SLC22A3	6	161005610	rs55730499	T	C	0.066	1.34 (1.12-1.59)	0.0011	0.111	1.4	3.04e-154	Van Der Harst P, Circ Res. ePub Dec 2017
70	LPA,PLG,LPAL2,SLC22A3	6	161056112	rs9365196	C	T	0.648	0.96 (0.88-1.06)	0.4317	0.707	1.06	7.97e-11	Verweij N; Sci Rep. 2017 Jun 5;7(1):2761
70	LPA,PLG,LPAL2,SLC22A3	6	161102643	rs9457995	G	A	0.703	1.10 (1.00-1.21)	0.0456	0.31	1.07	4.12e-15	Verweij N; Sci Rep. 2017 Jun 5;7(1):2761
70	LPA,PLG,LPAL2,SLC22A3	6	161111700	rs186696265	T	C	0.014	1.27 (0.89-1.82)	0.1898	0.503	1.73	4.61e-92	Van Der Harst P, Circ Res. ePub Dec 2017
70	LPA,PLG,LPAL2,SLC22A3	6	161143608	rs4252120	T	C	0.708	1.08 (0.98-1.18)	0.1218	0.407	1.03	5e-09	CardiogramplusC4D, Nat Genet. 2013 Jan;45(1):25-34
71	MAD1L1	7	1937261	rs10267593	G	A	0.822	1.10 (0.99-1.23)	0.0866	0.394	1.04	1.88e-08	Van Der Harst P, Circ Res. ePub Dec 2017
72	DAGLB*	7	6446027	rs10951983	A	G	0.783	0.96 (0.87-1.07)	0.4512	0.714	1.04	1.112e-07	Van Der Harst P, Circ Res. ePub Dec 2017
73	TMEM106B	7	12261911	rs11509880	A	G	0.334	1.05 (0.96-1.14)	0.3259	0.659	1.04	2.86e-08	Van Der Harst P, Circ Res. ePub Dec 2017
74	HDAC9	7	19049388	rs2107595	A	G	0.165	1.13 (1.01-1.26)	0.033	0.282	1.09	3.83e-24	Van Der Harst P, Circ Res. ePub Dec 2017
75	CCM2	7	45077978	rs2107732	G	A	0.91	1.12 (0.96-1.30)	0.1382	0.434	1.06	3.64e-08	Van Der Harst P, Circ Res. ePub Dec 2017
76	7q22(BCAP29)	7	107244545	rs10953541	C	T	0.758	1.03 (0.93-1.13)	0.5833	0.783	1.08	3e-08	C4D Consortium, Nat Genet. 2011 Mar 6;43(4):339-44;
77	CFTR,CCTNBP2	7	117332914	rs975722	G	A	0.396	1.05 (0.96-1.14)	0.2961	0.632	1.03	4.17e-08	Van Der Harst P, Circ Res. ePub Dec 2017
78	ZC3HC1	7	129663496	rs11556924	C	T	0.628	0.98 (0.90-1.07)	0.6539	0.839	1.06	1.38e-24	Van Der Harst P, Circ Res. ePub Dec 2017
79	PARP12	7	139757136	rs10237377	G	T	0.638	0.97 (0.89-1.06)	0.5502	0.767	1.05	1.75e-08	Howson JMM; Nat Genet. 2017 Jul;49(7):1113-1124
80	NOS3	7	150690176	rs3918226	T	C	0.077	1.24 (1.05-1.45)	0.009	0.152	1.13	3.3e-21	Van Der Harst P, Circ Res. ePub Dec 2017
81	NAT2	8	18286997	rs6997340	T	C	0.292	0.90 (0.82-0.99)	0.0325	0.282	1.04	4.98e-09	Van Der Harst P, Circ Res. ePub Dec 2017
82	LPL	8	19800529	rs6997330	C	G	0.021	1.15 (0.86-1.53)	0.3376	0.659	1.14	7.66e-11	Van Der Harst P, Circ Res. ePub Dec 2017
82	LPL	8	19824667	rs15285	C	T	0.713	1.00 (0.91-1.10)	0.9555	0.96	1.05	8.43e-14	Van Der Harst P, Circ Res. ePub Dec 2017
83	BMP1	8	22033615	rs6984210	G	C	0.055	1.17 (0.98-1.41)	0.0879	0.394	1.09	2.18e-11	Van Der Harst P, Circ Res. ePub Dec 2017
84	ZFPM2	8	106565414	rs10093110	G	A	0.591	1.09 (1.00-1.18)	0.0552	0.331	1.03	1.88e-08	Van Der Harst P, Circ Res. ePub Dec 2017
85	TRIB1	8	126490972	rs2954029	A	T	0.535	1.05 (0.96-1.14)	0.2795	0.632	1.07	1.37e-25	Van Der Harst P, Circ Res. ePub Dec 2017
86	CDKN2B,CDKN2A	9	21706571	rs896655	A	G	0.587	0.96 (0.88-1.05)	0.3939	0.706	1.04	1.59e-12	Van Der Harst P, Circ Res. ePub Dec 2017
86	CDKN2B,CDKN2A	9	21970916	rs3731249	T	C	0.029	1.08 (0.85-1.38)	0.5205	0.767	1.19	5.38e-11	Verweij N; Sci Rep. 2017 Jun 5;7(1):2761
86	CDKN2B,CDKN2A	9	22062012	rs4977754	A	C	0.952	1.13 (0.92-1.40)	0.2551	0.605	1.11	1.76e-08	Verweij N; Sci Rep. 2017 Jun 5;7(1):2761
86	CDKN2B,CDKN2A	9	22073996	rs1855185	G	T	0.923	1.08 (0.91-1.28)	0.3803	0.699	1.14	8.45e-11	Verweij N; Sci Rep. 2017 Jun 5;7(1):2761
86	CDKN2B,CDKN2A	9	22098619	rs2891168	G	A	0.507	1.10 (1.01-1.20)	0.0245	0.25	1.21	5.19e-204	Van Der Harst P, Circ Res. ePub Dec 2017
86	CDKN2B,CDKN2A	9	22113324	rs13301964	G	C	0.026	1.49 (1.12-1.99)	0.0065	0.133	1.24	9.57e-10	Verweij N; Sci Rep. 2017 Jun 5;7(1):2761
87	KLF4	9	110517794	rs944172	C	T	0.285	0.99 (0.90-1.09)	0.8722	0.927	1.04	1.11e-11	Van Der Harst P, Circ Res. ePub Dec 2017
88	SVEP1	9	113169775	rs111245230	C	T	0.037	1.24 (1.00-1.54)	0.0487	0.31	1.14	4.1e-10	Stitiziel NO; N Engl J Med. 2016 Mar 24;374(12):1134-44
89	DAB2IP	9	124420173	rs885150	C	T	0.258	1.05 (0.95-1.15)	0.3614	0.683	1.04	7.86e-10	Van Der Harst P, Circ Res. ePub Dec 2017
90	ABO	9	136149399	rs507666	A	G	0.209	1.11 (1.00-1.23)	0.0451	0.31	1.08	4.72e-20	Van Der Harst P, Circ Res. ePub Dec 2017
91	CDC123	10	12303813	rs61848342	C	T	0.36	1.01 (0.93-1.11)	0.7901	0.915	1.04	6.38e-10	Van Der Harst P, Circ Res. ePub Dec 2017
92	KIAA1462	10	30317073	rs9337951	A	G	0.338	1.04 (0.95-1.14)	0.4385	0.707	1.06	1.06e-17	Van Der Harst P, Circ Res. ePub Dec 2017
93	CXCL12	10	44480811	rs1870634	G	T	0.659	1.05 (0.96-1.15)	0.2751	0.632	1.07	2.35e-16	Verweij N; Sci Rep. 2017 Jun 5;7(1):2761
93	CXCL12	10	44777560	rs1657346	G	C	0.899	1.03 (0.89-1.19)	0.6944	0.857	1.1	1.6e-24	Van Der Harst P, Circ Res. ePub Dec 2017
94	TSPAN14	10	82251514	rs17680741	T	C	0.711	1.07 (0.97-1.17)	0.1681	0.47	1.05	2.33e-11	Van Der Harst P, Circ Res. ePub Dec 2017
95	LIPA	10	91004886	rs2246942	G	A	0.347	1.03 (0.95-1.13)	0.4646	0.723	1.07	2.16e-24	Van Der Harst P, Circ Res. ePub Dec 2017
96	AS3MT,CYP17A1,CNNM2	10	104638480	rs3740390	C	T	0.906	0.95 (0.82-1.10)	0.4752	0.733	1.07	4.4e-15	Van Der Harst P, Circ Res. ePub Dec 2017
97	STN1	10	105693644	rs4918072	A	G	0.272	1.00 (0.91-1.10)	0.9355	0.954	1.04	2.64e-09	Van Der Harst P, Circ Res. ePub Dec 2017
98	HTRA1	10	124237612	rs4752700	G	A	0.454	1.05 (0.96-1.14)	0.2941	0.632	1.03	8.02e-11	Van Der Harst P, Circ Res. ePub Dec 2017
99	TRIM5,TRIM22	11	5701074	rs11601507	A	C	0.069	1.14 (0.97-1.33)	0.1133	0.394	1.09	2.1e-12	Van Der Harst P, Circ Res. ePub Dec 2017
100	SWAP70	11	9751196	rs10840293	A	G	0.556	0.95 (0.87-1.03)	0.2351	0.578	1.05	8.95e-13	Van Der Harst P, Circ Res. ePub Dec 2017
100	MRVI1,CTR9	11	10745394	rs11042937	T	G	0.491	0.98 (0.91-1.07)	0.6961	0.857	1.04	1.18e-08	Webb TR; J Am Coll Cardiol. 2017 Feb 21;69(7):823-839
101	ARNTL	11	13301548	rs1351525	T	A	0.709	1.08 (0.98-1.18)	0.1116	0.394	1.05	4.09e-08	Verweij N; Sci Rep. 2017 Jun 5;7(1):2761
102	HSD17B12	11	43696917	rs7116641	G	T	0.322	0.94 (0.86-1.03)	0.1842	0.501	1.03	1.03e-08	Van Der Harst P, Circ Res. ePub Dec 2017
103	PCNX3	11	65391317	rs12801636	G	A	0.785	1.01 (0.91-1.12)	0.8688	0.927	1.05	9.71e-09	Howson JMM; Nat Genet. 2017 Jul;49(7):1113-1128
104	SERPINH1	11	75274150	rs590121	T	G	0.298	1.03 (0.94-1.13)	0.519	0.767	1.05	1.54e-08	Howson JMM; Nat Genet. 2017 Jul;49(7):1113-1123
104	SERPINH1	11	75284334	rs659418	T	G	0.865	1.20 (1.06-1.36)	0.005	0.119	1.05	3.92e-09	Van Der Harst P, Circ Res. ePub Dec 2017
105	ARHGAP42	11	100624599	rs7947761	G	A	0.288	0.99 (0.90-1.09)	0.8588	0.925	1.04	3e-09	Van Der Harst P, Circ Res. ePub Dec 2017
106	PDGFD,DYNC2H1	11	103660567	rs974819	T	C	0.305	1.11 (1.01-1.22)	0.0245	0.25	1.07	6.18e-29	Van Der Harst P, Circ Res. ePub Dec 2017
107	APOA1-A5-A4-C3,ZNF259	11	116648917	rs964184	G	C	0.139	0.96 (0.85-1.08)	0.5077	0.762	1.13	1.02e-17	Cardiogram, Nat Genet. 2011 Mar 6;43(4):333-11
108	C1S	12	7175872	rs11838267	T	C	0.867	1.10 (0.97-1.24)	0.1423	0.435	1.05	6.15e-10	Van Der Harst P, Circ Res. ePub Dec 2017
109	LOC156393	12	20220033	rs10841443	G	C	0.672	0.99 (0.91-1.09)	0.8585	0.925	1.05	7.89e-14	Van Der Harst P, Circ Res. ePub Dec 2017
110	HOXC4	12	54513915	rs11170820	G	C	0.064	1.20 (1.01-1.43)	0.0362	0.282	1.1	1.09e-13	Van Der Harst P, Circ Res. ePub Dec 2017
111	LRP1	12	57527283	rs11172113	C	T	0.41	1.05 (0.97-1.15)	0.2248	0.559	1.06	9.25e-14	Webb TR; J Am Coll Cardiol. 2017 Feb 21;69(7):823-836
112	ATP2B1	12	90013089	rs2681492	C	T	0.173	1.11 (0.99-1.24)	0.0633	0.347	1.07	2.61e-15	Van Der Harst P, Circ Res. ePub Dec 2017
113	NDUFA12	12	95355541	rs7306455	G	A	0.898	1.06 (0.92-1.22)	0.436	0.707	1.06	1.04e-08	Van Der Harst P, Circ Res. ePub Dec 2017
114	SH2B3,ATXN2,HNF1A	12	111884608	rs3184504	T	C	0.483	1.04 (0.95-1.13)	0.4169	0.707	1.08	5.14e-30	Van Der Harst P, Circ Res. ePub Dec 2017
115	KSR2	12	118265441	rs11830157	G	T	0.412	1.02 (0.93-1.11)	0.7335	0.87	1.04	0.000388	Nikpay M: Nat Genet. 2015 Oct;47(10):1121-1130
116	HNF1A	12	121416988	rs2244608	G	A	0.335	1.07 (0.98-1.17)	0.1315	0.422	1.05	7.27e-19	Van Der Harst P, Circ Res. ePub Dec 2017
117	SCARB1,CCDC92	12	124427306	rs11057401	T	A	0.688	0.92 (0.84-1.00)	0.0639	0.347	1.06	3.88e-09	Klarin D, Nat Genet. 2017 Sep;49(9):1392-1397
117	SCARB1,CCDC92	12	125307053	rs11057830	A	G	0.143	1.11 (0.98-1.24)	0.0971	0.394	1.09	2.71e-20	Van Der Harst P, Circ Res. ePub Dec 2017
118	FLT1	13	28973621	rs9319428	A	G	0.3	1.04 (0.95-1.14)	0.4334	0.707	1.05	5e-10	CardiogramplusC4D, Nat Genet. 2013 Jan;45(1):25-36
119	N4BP2L2	13	33058333	rs9591012	G	A	0.641	0.97 (0.89-1.06)	0.4919	0.747	1.04	7.04e-11	Van Der Harst P, Circ Res. ePub Dec 2017
120	COL4A1/A2	13	110818102	rs11617955	T	A	0.891	1.01 (0.88-1.16)	0.9025	0.939	1.08	3.6e-17	Van Der Harst P, Circ Res. ePub Dec 2017
120	COL4A1/A2	13	110960943	rs3809346	A	G	0.436	1.03 (0.94-1.12)	0.5567	0.767	1.05	8.89e-18	Van Der Harst P, Circ Res. ePub Dec 2017
120	COL4A1/A2	13	111040681	rs11838776	A	G	0.276	1.05 (0.96-1.16)	0.2993	0.632	1.07	1.83e-10	Nikpay M: Nat Genet. 2015 Oct;47(10):1121-1130
120	COL4A1/A2	13	111049623	rs9515203	T	C	0.733	1.12 (1.02-1.23)	0.0181	0.244	1.07	5.76e-24	Van Der Harst P, Circ Res. ePub Dec 2017
121	MCF2L	13	113631780	rs1317507	A	C	0.264	1.00 (0.91-1.10)	0.9466	0.96	1.04	8.45e-12	Van Der Harst P, Circ Res. ePub Dec 2017
122	ARID4A	14	58794001	rs2145598	G	A	0.43	0.98 (0.90-1.07)	0.6915	0.857	1.03	4.26e-08	Van Der Harst P, Circ Res. ePub Dec 2017
123	TMED10	14	75614504	rs3832966	ACC	A	0.474	1.05 (0.97-1.14)	0.2524	0.605	1.05	5.8e-10	Verweij N; Sci Rep. 2017 Jun 5;7(1):2761
124	SERPINA1,SERPINA2	14	94838142	rs112635299	G	T	0.984	1.79 (1.22-2.63)	0.0029	0.118	1.15	8.44e-10	Van Der Harst P, Circ Res. ePub Dec 2017
125	HHIPL1,CYP46A1	14	100133942	rs2895811	C	T	0.416	1.13 (1.04-1.23)	0.0044	0.119	1.07	1.14e-10	Cardiogram, Nat Genet. 2011 Mar 6;43(4):333-8
125	HHIPL1,CYP46A1	14	100148961	rs8003602	C	T	0.74	1.05 (0.95-1.16)	0.3035	0.632	1.06	4.91e-16	Van Der Harst P, Circ Res. ePub Dec 2017
126	OAZ2,RBPMS2	15	65024204	rs6494488	A	G	0.843	1.02 (0.91-1.15)	0.7063	0.857	1.05	2.09e-08	Howson JMM; Nat Genet. 2017 Jul;49(7):1113-1126
127	SMAD3	15	67450305	rs17228058	A	G	0.774	0.91 (0.83-1.01)	0.082	0.394	1.07	3.72e-17	Van Der Harst P, Circ Res. ePub Dec 2017
128	ADAMTS7	15	79017861	rs8039034	C	T	0.26	1.03 (0.94-1.13)	0.5318	0.767	1.08	4.92e-14	Verweij N; Sci Rep. 2017 Jun 5;7(1):2761
128	ADAMTS7	15	79139000	rs11637783	T	C	0.552	1.06 (0.97-1.15)	0.1872	0.503	1.08	1.21e-30	Van Der Harst P, Circ Res. ePub Dec 2017
129	MFGE8-ABHD2	15	89574218	rs8042271	G	A	0.951	1.17 (0.95-1.45)	0.1429	0.435	1.1	3.68e-08	Nikpay M: Nat Genet. 2015 Oct;47(10):1121-1130
130	FURIN	15	91416550	rs17514846	A	C	0.455	1.08 (0.99-1.18)	0.0663	0.347	1.06	7.84e-27	Van Der Harst P, Circ Res. ePub Dec 2017
131	LINC00924 (15q26.2)	15	96146414	rs17581137	A	C	0.752	1.06 (0.96-1.17)	0.2819	0.632	1.04	1.21e-08	Van Der Harst P, Circ Res. ePub Dec 2017
132	CETP	16	56995236	rs1800775	C	A	0.513	0.98 (0.90-1.07)	0.6275	0.818	1.04	9.83e-09	Webb TR; J Am Coll Cardiol. 2017 Feb 21;69(7):823-838
133	DHX38,TXNL4B	16	72130815	rs1050362	A	C	0.365	1.07 (0.98-1.16)	0.1576	0.453	1.04	2.67e-11	Van Der Harst P, Circ Res. ePub Dec 2017
134	CFDP1	16	75462055	rs12930452	G	A	0.602	1.09 (1.00-1.18)	0.064	0.347	1.05	1.2e-15	Van Der Harst P, Circ Res. ePub Dec 2017
135	PLCG2	16	81906423	rs7199941	A	G	0.381	1.03 (0.95-1.13)	0.4449	0.709	1.04	9.22e-13	Van Der Harst P, Circ Res. ePub Dec 2017
136	CDH13	16	83045790	rs7500448	A	G	0.748	1.01 (0.92-1.11)	0.8538	0.925	1.07	1.64e-16	Van Der Harst P, Circ Res. ePub Dec 2017
137	SMG6,SRR	17	2126504	rs216172	C	G	0.346	1.05 (0.96-1.14)	0.3149	0.649	1.07	1.15e-09	Cardiogram, Nat Genet. 2011 Mar 6;43(4):333-10
137	SMG6,SRR	17	2170216	rs170041	C	T	0.729	1.15 (1.04-1.26)	0.0048	0.119	1.05	9.28e-17	Van Der Harst P, Circ Res. ePub Dec 2017
138	RASD1, SMCR3, PEMT	17	17543722	rs12936587	G	A	0.55	0.97 (0.90-1.06)	0.5521	0.767	1.07	4.45e-10	Cardiogram, Nat Genet. 2011 Mar 6;43(4):333-12
139	CORO6,ANKRD13B	17	27941886	rs13723	G	A	0.498	1.03 (0.94-1.11)	0.5545	0.767	1.04	5.6e-10	Van Der Harst P, Circ Res. ePub Dec 2017
140	(17q11.2)	17	30033514	rs76954792	T	C	0.242	0.96 (0.87-1.06)	0.3762	0.699	1.04	1.19e-08	Van Der Harst P, Circ Res. ePub Dec 2017
141	DHX58,KAT2A	17	40257163	rs2074158	C	T	0.172	1.08 (0.96-1.20)	0.1997	0.521	1.06	2.27e-10	Van Der Harst P, Circ Res. ePub Dec 2017
142	GOSR2	17	45013271	rs17608766	C	T	0.138	0.90 (0.79-1.02)	0.0968	0.394	1.07	4.14e-08	Howson JMM; Nat Genet. 2017 Jul;49(7):1113-1121
143	UBE2Z,GIP	17	47047868	rs3895874	A	G	0.575	1.05 (0.96-1.14)	0.2904	0.632	1.04	1.45e-09	Van Der Harst P, Circ Res. ePub Dec 2017
143	UBE2Z,ZNF652	17	47440466	rs16948048	G	A	0.379	0.98 (0.90-1.07)	0.6166	0.817	1.05	2.73e-16	Van Der Harst P, Circ Res. ePub Dec 2017
144	BCAS3	17	59013488	rs7212798	C	T	0.162	0.96 (0.86-1.08)	0.4944	0.747	1.08	7e-10	Verweij N; Sci Rep. 2017 Jun 5;7(1):2761
145	PECAM1	17	62387091	rs1867624	T	C	0.618	1.07 (0.98-1.17)	0.116	0.394	1.04	3.98e-08	Howson JMM; Nat Genet. 2017 Jul;49(7):1113-1122
146	ACAA2	18	47229717	rs9964304	C	A	0.281	0.98 (0.89-1.08)	0.6695	0.848	1.04	1.14e-09	Van Der Harst P, Circ Res. ePub Dec 2017
147	PMAIP1,MC4R	18	57838401	rs663129	A	G	0.239	1.03 (0.93-1.13)	0.581	0.783	1.06	3.2e-08	Nikpay M: Nat Genet. 2015 Oct;47(10):1121-1130
148	ANGPTL4	19	8429323	rs116843064	G	A	0.983	1.32 (0.94-1.87)	0.113	0.394	1.17	1.27e-11	Van Der Harst P, Circ Res. ePub Dec 2017
149	LDLR	19	11202306	rs6511720	G	T	0.883	0.95 (0.83-1.08)	0.4197	0.707	1.15	4.88e-41	Van Der Harst P, Circ Res. ePub Dec 2017
149	LDLR	19	11277232	rs4804573	G	A	0.527	1.05 (0.96-1.14)	0.2822	0.632	1.05	1.85e-08	Verweij N; Sci Rep. 2017 Jun 5;7(1):2761
150	MAP1S,FCHO1	19	17855763	rs73015714	G	C	0.198	1.02 (0.92-1.13)	0.7279	0.868	1.06	8.35e-14	Van Der Harst P, Circ Res. ePub Dec 2017
151	ZNF507,LOC400684	19	32882020	rs12976411	A	T	0.964	1.12 (0.89-1.41)	0.3464	0.667	1.05	0.00912	Nikpay M: Nat Genet. 2015 Oct;47(10):1121-1130
152	TGFB1,CCDC97	19	41790086	rs138120077	G	GTT	0.165	0.98 (0.88-1.10)	0.764	0.901	1.07	9.44e-09	Verweij N; Sci Rep. 2017 Jun 5;7(1):2761
152	TGFB1,CCDC97	19	41832231	rs12980942	G	A	0.846	0.94 (0.84-1.06)	0.3324	0.659	1.06	7.35e-15	Van Der Harst P, Circ Res. ePub Dec 2017
152	TGFB1,CCDC97	19	41851509	rs4803455	C	A	0.495	1.01 (0.93-1.10)	0.8021	0.915	1.06	3.77e-17	Van Der Harst P, Circ Res. ePub Dec 2017
153	APOE,APOC1,TOMM4	19	45412079	rs7412	C	T	0.923	0.94 (0.80-1.10)	0.4401	0.707	1.17	3.02e-39	Van Der Harst P, Circ Res. ePub Dec 2017
153	APOE,APOC1,TOMM4	19	45422946	rs4420638	G	A	0.173	1.01 (0.91-1.13)	0.8251	0.925	1.09	2.73e-14	Verweij N; Sci Rep. 2017 Jun 5;7(1):2761
153	SNRPD2	19	46190268	rs1964272	G	A	0.52	0.99 (0.91-1.08)	0.8579	0.925	1.05	2.52e-08	Nelson CP, Nat Genet. 2017 Sep;49(9):1385-1391
154	NCOA6	20	33313566	rs6088590	C	T	0.406	1.02 (0.94-1.11)	0.6348	0.82	1.03	2.28e-09	Van Der Harst P, Circ Res. ePub Dec 2017
154	PROCR	20	33764554	rs867186	A	G	0.904	0.99 (0.86-1.13)	0.8373	0.925	1.08	2.7e-09	Howson JMM; Nat Genet. 2017 Jul;49(7):1113-1127
155	ZHX3	20	39924279	rs6102343	A	G	0.234	0.96 (0.87-1.06)	0.4026	0.706	1.04	1.12e-08	Van Der Harst P, Circ Res. ePub Dec 2017
156	PCIF1,ZNF335	20	44586023	rs3827066	T	C	0.16	1.16 (1.03-1.30)	0.0119	0.187	1.04	4.4e-09	Van Der Harst P, Circ Res. ePub Dec 2017
157	ZNF831	20	57714025	rs260020	T	C	0.131	1.10 (0.97-1.25)	0.1305	0.422	1.05	7.96e-10	Van Der Harst P, Circ Res. ePub Dec 2017
158	MAP3K7CL	21	30533076	rs2832227	G	A	0.149	1.04 (0.92-1.17)	0.5502	0.767	1.04	1.73e-09	Van Der Harst P, Circ Res. ePub Dec 2017
159	MRPS6	21	35593827	rs28451064	A	G	0.127	1.17 (1.02-1.33)	0.0204	0.244	1.13	7.09e-33	Van Der Harst P, Circ Res. ePub Dec 2017
160	POM121L9P,ADORA2A	22	24658858	rs180803	G	T	0.987	0.75 (0.52-1.07)	0.1132	0.394	1.2	1.64e-10	Nikpay M: Nat Genet. 2015 Oct;47(10):1121-1130
